# Supplementary material for: Substituent steering of dihedral angles around single bonds: the case of succinonitrile
Source: Royal Society of Chemistry journal article supplement (doi:10.1039/c3cp53609b), 2013-12-17
Supplement: c3cp53609b.pdf [file c3cp53609b.pdf]

## Supplemental material

### Substituent steering of dihedral angles around single bonds: The case of succinonitrile

Michaela K. Jahn<sup>1</sup>, Jens-Uwe Grabow<sup>1</sup>, Peter D. Godfrey<sup>2</sup> and Don McNaughton<sup>2</sup>.

<sup>1</sup>*Gottfried-Wilhelm-Leibniz-Universität, Institut für Physikalische Chemie & Elektrochemie,  
Lehrgebiet A, Callinstraße 3A, D-30167 Hannover, Germany*

<sup>2</sup>*School of Chemistry, Monash University, Clayton, Victoria 3800, Australia*

S1: Rotational transitions of the main isotopologue of succinonitrile

| J | K <sub>a</sub> | K <sub>c</sub> | F <sub>1</sub> | F  | J' | K <sub>a</sub> | K <sub>c</sub> | F <sub>1</sub> | F  | v <sub>obs</sub> /MHz | v <sub>calc</sub> /MHz | Δv/MHz   |
|---|----------------|----------------|----------------|----|----|----------------|----------------|----------------|----|-----------------------|------------------------|----------|
| 4 | 0              | 4              | 3              | 2  | 3  | 1              | 3              | 2              | 1  | 13242.96841           | 13242.96822            | 0.00019  |
| 4 | 0              | 4              | 3              | 4  | 3  | 1              | 3              | 2              | 3  | 13243.11094           | 13243.11106            | -0.00012 |
| 4 | 0              | 4              | 5              | 4  | 3  | 1              | 3              | 4              | 3  | 13243.16023           | 13243.15978            | 0.00045  |
| 4 | 0              | 4              | 5              | 6  | 3  | 1              | 3              | 4              | 5  | 13243.25850           | 13243.25891            | -0.00041 |
| 4 | 0              | 4              | 5              | 5  | 3  | 1              | 3              | 4              | 4  | 13243.50145           | 13243.50119            | 0.00026  |
| 4 | 0              | 4              | 4              | 5  | 3  | 1              | 3              | 3              | 4  | 13243.69998           | 13243.69983            | 0.00015  |
| 4 | 0              | 4              | 4              | 4  | 3  | 1              | 3              | 3              | 3  | 13243.89825           | 13243.89839            | -0.00014 |
| 4 | 2              | 2              | 5              | 6  | 4  | 1              | 3              | 5              | 6  | 12548.10396           | 12548.10246            | 0.00150  |
| 4 | 2              | 2              | 4              | 4  | 4  | 1              | 3              | 4              | 4  | 12547.52780           | 12547.52781            | -0.00001 |
| 4 | 2              | 2              | 4              | 5  | 4  | 1              | 3              | 4              | 5  | 12547.74799           | 12547.74787            | 0.00012  |
| 4 | 2              | 2              | 4              | 3  | 4  | 1              | 3              | 4              | 3  | 12547.78855           | 12547.78970            | -0.00115 |
| 4 | 2              | 2              | 5              | 5  | 4  | 1              | 3              | 5              | 5  | 12547.86677           | 12547.86584            | 0.00093  |
| 4 | 2              | 2              | 3              | 3  | 4  | 1              | 3              | 3              | 3  | 12547.97526           | 12547.97586            | -0.00060 |
| 4 | 2              | 2              | 5              | 4  | 4  | 1              | 3              | 5              | 4  | 12548.16093           | 12548.16137            | -0.00044 |
| 2 | 2              | 0              | 2              | 2  | 2  | 1              | 1              | 2              | 2  | 13660.35472           | 13660.35399            | 0.00073  |
| 2 | 2              | 0              | 2              | 3  | 2  | 1              | 1              | 2              | 3  | 13660.57925           | 13660.57878            | 0.00047  |
| 2 | 2              | 0              | 2              | 2  | 2  | 1              | 1              | 2              | 3  | 13660.61168           | 13660.61260            | -0.00092 |
| 2 | 2              | 0              | 3              | 3  | 2  | 1              | 1              | 3              | 3  | 13660.89714           | 13660.89771            | -0.00057 |
| 2 | 2              | 0              | 3              | 4  | 2  | 1              | 1              | 3              | 4  | 13661.21045           | 13661.21082            | -0.00037 |
| 2 | 2              | 0              | 3              | 2  | 2  | 1              | 1              | 3              | 2  | 13661.36752           | 13661.36794            | -0.00042 |
| 2 | 2              | 0              | 1              | 2  | 2  | 1              | 1              | 1              | 2  | 13661.48469           | 13661.48573            | -0.00104 |
| 2 | 2              | 0              | 1              | 1  | 2  | 1              | 1              | 1              | 0  | 13661.79908           | 13661.79978            | -0.00070 |
| 2 | 1              | 2              | 2              | 2  | 1  | 0              | 1              | 1              | 1  | 12608.35779           | 12608.35850            | -0.00071 |
| 2 | 1              | 2              | 2              | 3  | 1  | 0              | 1              | 2              | 3  | 12608.59861           | 12608.59923            | -0.00062 |
| 2 | 1              | 2              | 2              | 3  | 1  | 0              | 1              | 1              | 2  | 12608.63158           | 12608.63028            | 0.00130  |
| 2 | 1              | 2              | 2              | 1  | 1  | 0              | 1              | 1              | 0  | 12608.70430           | 12608.70468            | -0.00038 |
| 2 | 1              | 2              | 3              | 3  | 1  | 0              | 1              | 2              | 2  | 12608.99710           | 12608.99460            | 0.00250  |
| 2 | 1              | 2              | 3              | 4  | 1  | 0              | 1              | 2              | 3  | 12609.37088           | 12609.36914            | 0.00174  |
| 2 | 1              | 2              | 1              | 1  | 1  | 0              | 1              | 0              | 1  | 12609.52393           | 12609.52411            | -0.00018 |
| 2 | 1              | 2              | 3              | 2  | 1  | 0              | 1              | 2              | 1  | 12609.55178           | 12609.55202            | -0.00024 |
| 2 | 1              | 2              | 1              | 2  | 1  | 0              | 1              | 0              | 1  | 12609.66497           | 12609.66440            | 0.00057  |
| 2 | 1              | 2              | 1              | 2  | 1  | 0              | 1              | 1              | 1  | 12609.72915           | 12609.73017            | -0.00102 |
| 5 | 2              | 3              | 5              | 5  | 5  | 1              | 4              | 5              | 5  | 12110.80847           | 12110.80826            | 0.00021  |
| 5 | 2              | 3              | 5              | 6  | 5  | 1              | 4              | 5              | 6  | 12110.93674           | 12110.93552            | 0.00122  |
| 5 | 2              | 3              | 5              | 4  | 5  | 1              | 4              | 5              | 4  | 12110.95467           | 12110.95558            | -0.00091 |
| 5 | 2              | 3              | 6              | 6  | 5  | 1              | 4              | 6              | 6  | 12110.98911           | 12110.98833            | 0.00078  |
| 5 | 2              | 3              | 4              | 4  | 5  | 1              | 4              | 4              | 4  | 12111.03347           | 12111.03273            | 0.00074  |
| 5 | 2              | 3              | 6              | 7  | 5  | 1              | 4              | 6              | 7  | 12111.12201           | 12111.12130            | 0.00071  |
| 5 | 2              | 3              | 6              | 5  | 5  | 1              | 4              | 6              | 5  | 12111.14634           | 12111.14740            | -0.00106 |
| 8 | 2              | 6              | 7              | 6  | 8  | 1              | 7              | 7              | 6  | 12762.06527           | 12762.06520            | 0.00007  |
| 8 | 2              | 6              | 7              | 8  | 8  | 1              | 7              | 7              | 8  | 12762.09840           | 12762.09907            | -0.00067 |
| 8 | 2              | 6              | 9              | 10 | 8  | 1              | 7              | 9              | 10 | 12762.13297           | 12762.13302            | -0.00005 |
| 8 | 2              | 6              | 7              | 7  | 8  | 1              | 7              | 7              | 7  | 12762.33024           | 12762.33002            | 0.00022  |
| 8 | 2              | 6              | 9              | 9  | 8  | 1              | 7              | 9              | 9  | 12762.37312           | 12762.37196            | 0.00116  |

| J | K <sub>a</sub> | K <sub>c</sub> | F <sub>1</sub> | F | J' | K <sub>a</sub> | K <sub>c</sub> | F <sub>1</sub> | F | V <sub>obs./MHz</sub> | V <sub>calc./MHz</sub> | Δv/MHz   |
|---|----------------|----------------|----------------|---|----|----------------|----------------|----------------|---|-----------------------|------------------------|----------|
| 8 | 2              | 6              | 8              | 7 | 8  | 1              | 7              | 8              | 7 | 12762.40490           | 12762.40575            | -0.00085 |
| 8 | 2              | 6              | 8              | 9 | 8  | 1              | 7              | 8              | 9 | 12762.43182           | 12762.43166            | 0.00016  |
| 8 | 2              | 6              | 8              | 8 | 8  | 1              | 7              | 8              | 8 | 12762.66698           | 12762.66670            | 0.00028  |
| 6 | 1              | 5              | 5              | 4 | 6  | 0              | 6              | 5              | 4 | 11472.56982           | 11472.56950            | 0.00032  |
| 6 | 1              | 5              | 5              | 6 | 6  | 0              | 6              | 5              | 6 | 11472.73164           | 11472.73253            | -0.00089 |
| 6 | 1              | 5              | 7              | 6 | 6  | 0              | 6              | 7              | 6 | 11472.75900           | 11472.75796            | 0.00104  |
| 6 | 1              | 5              | 7              | 8 | 6  | 0              | 6              | 7              | 8 | 11472.89450           | 11472.89617            | -0.00167 |
| 6 | 1              | 5              | 5              | 5 | 6  | 0              | 6              | 5              | 5 | 11473.51147           | 11473.51153            | -0.00006 |
| 6 | 1              | 5              | 7              | 7 | 6  | 0              | 6              | 7              | 7 | 11473.72617           | 11473.72515            | 0.00102  |
| 6 | 1              | 5              | 6              | 5 | 6  | 0              | 6              | 6              | 5 | 11473.89032           | 11473.88838            | 0.00194  |
| 6 | 1              | 5              | 6              | 7 | 6  | 0              | 6              | 6              | 7 | 11474.00019           | 11474.00146            | -0.00127 |
| 6 | 1              | 5              | 6              | 6 | 6  | 0              | 6              | 6              | 6 | 11474.80524           | 11474.80567            | -0.00043 |
| 3 | 1              | 3              | 3              | 3 | 2  | 0              | 2              | 2              | 3 | 16176.96852           | 16176.96973            | -0.00121 |
| 3 | 1              | 3              | 3              | 3 | 2  | 0              | 2              | 2              | 2 | 16177.00598           | 16177.00592            | 0.00006  |
| 3 | 1              | 3              | 3              | 4 | 2  | 0              | 2              | 2              | 3 | 16177.37733           | 16177.37685            | 0.00048  |
| 3 | 1              | 3              | 3              | 2 | 2  | 0              | 2              | 2              | 1 | 16177.46018           | 16177.46102            | -0.00084 |
| 3 | 1              | 3              | 4              | 4 | 2  | 0              | 2              | 3              | 3 | 16177.63664           | 16177.63525            | 0.00139  |
| 3 | 1              | 3              | 2              | 2 | 2  | 0              | 2              | 1              | 2 | 16177.87985           | 16177.87953            | 0.00032  |
| 3 | 1              | 3              | 2              | 2 | 2  | 0              | 2              | 1              | 1 | 16177.89877           | 16177.89877            | 0.00000  |
| 3 | 1              | 3              | 4              | 5 | 2  | 0              | 2              | 3              | 4 | 16178.05236           | 16178.04946            | 0.00290  |
| 3 | 1              | 3              | 4              | 3 | 2  | 0              | 2              | 3              | 2 | 16178.17887           | 16178.17788            | 0.00099  |
| 3 | 1              | 3              | 2              | 3 | 2  | 0              | 2              | 1              | 2 | 16178.22416           | 16178.22420            | -0.00004 |
| 3 | 1              | 3              | 2              | 1 | 2  | 0              | 2              | 1              | 0 | 16178.39388           | 16178.39539            | -0.00151 |
| 3 | 1              | 3              | 2              | 1 | 2  | 0              | 2              | 1              | 1 | 16178.45543           | 16178.45815            | -0.00272 |
| 3 | 2              | 1              | 2              | 2 | 3  | 1              | 2              | 3              | 3 | 13107.74684           | 13107.74926            | -0.00242 |
| 3 | 2              | 1              | 3              | 4 | 3  | 1              | 2              | 3              | 3 | 13107.90187           | 13107.90037            | 0.00150  |
| 3 | 2              | 1              | 3              | 3 | 3  | 1              | 2              | 3              | 3 | 13107.99451           | 13107.99438            | 0.00013  |
| 3 | 2              | 1              | 2              | 3 | 3  | 1              | 2              | 3              | 4 | 13108.02562           | 13108.02648            | -0.00086 |
| 3 | 2              | 1              | 3              | 4 | 3  | 1              | 2              | 3              | 4 | 13108.25811           | 13108.25720            | 0.00091  |
| 3 | 2              | 1              | 3              | 2 | 3  | 1              | 2              | 3              | 2 | 13108.32144           | 13108.32309            | -0.00165 |
| 3 | 2              | 1              | 4              | 4 | 3  | 1              | 2              | 4              | 4 | 13108.46206           | 13108.46234            | -0.00028 |
| 3 | 2              | 1              | 2              | 3 | 3  | 1              | 2              | 2              | 2 | 13108.60774           | 13108.60542            | 0.00232  |
| 3 | 2              | 1              | 2              | 2 | 3  | 1              | 2              | 2              | 2 | 13108.68339           | 13108.68504            | -0.00165 |
| 3 | 2              | 1              | 4              | 5 | 3  | 1              | 2              | 4              | 5 | 13108.76649           | 13108.76522            | 0.00127  |
| 3 | 2              | 1              | 4              | 3 | 3  | 1              | 2              | 4              | 3 | 13108.87160           | 13108.87225            | -0.00065 |
| 3 | 2              | 1              | 2              | 3 | 3  | 1              | 2              | 2              | 3 | 13108.91305           | 13108.91252            | 0.00053  |
| 3 | 2              | 1              | 2              | 1 | 3  | 1              | 2              | 2              | 1 | 13109.05988           | 13109.06035            | -0.00047 |
| 3 | 2              | 1              | 2              | 2 | 3  | 1              | 2              | 2              | 1 | 13109.19043           | 13109.18954            | 0.00089  |
| 3 | 2              | 1              | 4              | 4 | 3  | 1              | 2              | 4              | 3 | 13109.01823           | 13109.01649            | 0.00174  |
| 4 | 0              | 4              | 4              | 3 | 3  | 1              | 3              | 3              | 2 | 13243.64498           | 13243.64688            | -0.00190 |
| 4 | 2              | 2              | 3              | 2 | 4  | 1              | 3              | 3              | 2 | 12548.25214           | 12548.25406            | -0.00192 |
| 4 | 4              | 1              | 5              | 6 | 3  | 3              | 0              | 4              | 5 | 50560.68070           | 50560.69071            | -0.01001 |
| 4 | 4              | 0              | 5              | 6 | 3  | 3              | 1              | 4              | 5 | 50562.43790           | 50562.44782            | -0.00992 |
| 5 | 4              | 2              | 6              | 7 | 4  | 3              | 1              | 5              | 6 | 54838.07960           | 54838.08881            | -0.00921 |
| 5 | 4              | 1              | 6              | 7 | 4  | 3              | 2              | 5              | 6 | 54850.46830           | 54850.47744            | -0.00914 |

| J  | K <sub>a</sub> | K <sub>c</sub> | F <sub>1</sub> | F  | J' | K <sub>a</sub> | K <sub>c</sub> | F <sub>1</sub> | F  | v <sub>obs./MHz</sub> | v <sub>calc./MHz</sub> | Δv/MHz   |
|----|----------------|----------------|----------------|----|----|----------------|----------------|----------------|----|-----------------------|------------------------|----------|
| 6  | 4              | 3              | 7              | 8  | 5  | 3              | 2              | 6              | 7  | 59092.39440           | 59092.40474            | -0.01034 |
| 6  | 4              | 2              | 7              | 8  | 5  | 3              | 3              | 6              | 7  | 59142.21450           | 59142.22458            | -0.01008 |
| 6  | 5              | 2              | 7              | 8  | 5  | 4              | 1              | 6              | 7  | 68675.01540           | 68674.98963            | 0.02577  |
| 7  | 6              | 1              | 8              | 9  | 7  | 5              | 2              | 8              | 9  | 52455.09070           | 52455.05780            | 0.03290  |
| 7  | 6              | 2              | 8              | 8  | 7  | 5              | 3              | 8              | 8  | 52455.24200           | 52455.20913            | 0.03287  |
| 7  | 4              | 4              | 8              | 9  | 6  | 3              | 3              | 7              | 8  | 63297.00000           | 63297.01348            | -0.01348 |
| 7  | 4              | 3              | 8              | 8  | 6  | 3              | 4              | 7              | 7  | 63446.74580           | 63446.75907            | -0.01327 |
| 7  | 3              | 4              | 8              | 9  | 6  | 2              | 5              | 7              | 8  | 54981.27530           | 54981.27247            | 0.00283  |
| 8  | 6              | 2              | 9              | 9  | 8  | 5              | 3              | 9              | 9  | 52419.27110           | 52419.24594            | 0.02516  |
| 8  | 6              | 3              | 9              | 9  | 8  | 5              | 4              | 9              | 9  | 52419.92080           | 52419.89570            | 0.02510  |
| 8  | 4              | 5              | 9              | 10 | 7  | 3              | 4              | 8              | 9  | 67410.18970           | 67410.20803            | -0.01833 |
| 8  | 4              | 4              | 9              | 10 | 7  | 3              | 5              | 8              | 9  | 67783.23660           | 67783.26043            | -0.02383 |
| 9  | 4              | 6              | 10             | 11 | 8  | 3              | 5              | 9              | 10 | 71373.36190           | 71373.38567            | -0.02377 |
| 9  | 6              | 3              | 10             | 11 | 9  | 5              | 4              | 10             | 11 | 52366.21390           | 52366.19721            | 0.01669  |
| 9  | 6              | 4              | 10             | 11 | 9  | 5              | 5              | 10             | 11 | 52368.46140           | 52368.44513            | 0.01627  |
| 10 | 6              | 4              | 11             | 12 | 10 | 5              | 5              | 11             | 12 | 52290.53620           | 52290.52862            | 0.00758  |
| 10 | 6              | 5              | 11             | 12 | 10 | 5              | 6              | 11             | 12 | 52297.18210           | 52297.17565            | 0.00645  |
| 11 | 6              | 6              | 12             | 13 | 11 | 5              | 7              | 12             | 13 | 52202.61420           | 52202.61851            | -0.00431 |
| 11 | 2              | 10             | 12             | 13 | 10 | 1              | 9              | 11             | 12 | 50040.98130           | 50040.98711            | -0.00581 |
| 11 | 6              | 5              | 12             | 13 | 11 | 5              | 6              | 12             | 13 | 52185.20540           | 52185.20668            | -0.00128 |
| 12 | 6              | 6              | 13             | 14 | 12 | 5              | 7              | 13             | 14 | 52040.68550           | 52040.69409            | -0.00859 |
| 12 | 6              | 7              | 13             | 14 | 12 | 5              | 8              | 13             | 14 | 52082.04750           | 52082.06375            | -0.01625 |
| 12 | 2              | 11             | 13             | 14 | 11 | 1              | 10             | 12             | 13 | 52884.01780           | 52883.99752            | 0.02028  |
| 13 | 0              | 13             | 14             | 14 | 12 | 1              | 12             | 13             | 13 | 50783.46980           | 50783.47165            | -0.00185 |
| 13 | 1              | 13             | 14             | 15 | 12 | 0              | 12             | 13             | 14 | 50956.21170           | 50956.22252            | -0.01082 |
| 13 | 6              | 7              | 14             | 15 | 13 | 5              | 8              | 14             | 15 | 51843.70680           | 51843.71895            | -0.01215 |
| 13 | 6              | 8              | 14             | 15 | 13 | 5              | 9              | 14             | 15 | 51934.31430           | 51934.34409            | -0.02979 |
| 13 | 2              | 12             | 14             | 15 | 12 | 1              | 11             | 13             | 14 | 55900.54830           | 55900.50095            | 0.04735  |
| 14 | 2              | 12             | 15             | 16 | 13 | 3              | 11             | 14             | 15 | 51722.74260           | 51722.76628            | -0.02368 |
| 14 | 6              | 9              | 15             | 16 | 14 | 5              | 10             | 15             | 16 | 51760.80550           | 51760.85140            | -0.04590 |
| 14 | 1              | 14             | 15             | 16 | 13 | 0              | 13             | 14             | 15 | 54711.36870           | 54711.37765            | -0.00895 |
| 14 | 0              | 14             | 15             | 16 | 13 | 1              | 13             | 14             | 15 | 54607.87820           | 54607.88137            | -0.00317 |
| 15 | 2              | 13             | 16             | 16 | 14 | 3              | 12             | 15             | 15 | 57605.94880           | 57605.99537            | -0.04657 |
| 16 | 0              | 16             | 17             | 18 | 15 | 1              | 15             | 16             | 17 | 62220.82300           | 62220.82762            | -0.00462 |
| 16 | 1              | 16             | 17             | 18 | 15 | 0              | 15             | 16             | 17 | 62257.01020           | 62257.01706            | -0.00686 |
| 17 | 0              | 17             | 18             | 19 | 16 | 1              | 16             | 17             | 18 | 66017.63060           | 66017.63576            | -0.00516 |
| 17 | 1              | 17             | 18             | 19 | 16 | 0              | 16             | 17             | 18 | 66038.80630           | 66038.81283            | -0.00653 |
| 18 | 0              | 18             | 19             | 20 | 17 | 1              | 17             | 18             | 19 | 69811.02130           | 69811.02703            | -0.00573 |
| 18 | 1              | 18             | 19             | 20 | 17 | 0              | 17             | 18             | 19 | 69823.34280           | 69823.34936            | -0.00656 |
| 6  | 3              | 4              | 7              | 7  | 5  | 2              | 3              | 6              | 6  | 48812.92810           | 48812.95623            | -0.02813 |
| 7  | 3              | 5              | 8              | 9  | 6  | 2              | 4              | 7              | 8  | 52370.51980           | 52370.55813            | -0.03833 |
| 13 | 1              | 12             | 14             | 15 | 12 | 2              | 11             | 13             | 14 | 52197.92360           | 52197.83836            | 0.08524  |
| 14 | 1              | 13             | 15             | 16 | 13 | 2              | 12             | 14             | 15 | 56576.88140           | 56576.79121            | 0.09019  |
| 7  | 2              | 5              | 6              | 6  | 6  | 1              | 6              | 5              | 5  | 53043.99760           | 53043.88803            | 0.10957  |

S2: Rotational transitions of  $^{13}\text{CH}_2$  isotopologue of succinonitrile

| J  | K <sub>a</sub> | K <sub>c</sub> | J' | K <sub>a</sub> | K <sub>c</sub> | $\nu_{\text{obs.}}/\text{MHz}$ | $\nu_{\text{calc.}}/\text{MHz}$ | $\Delta\nu/\text{MHz}$ |
|----|----------------|----------------|----|----------------|----------------|--------------------------------|---------------------------------|------------------------|
| 4  | 4              | 1              | 3  | 3              | 0              | 49764.533                      | 49764.550                       | -0.017                 |
| 4  | 4              | 0              | 3  | 3              | 1              | 49766.447                      | 49766.432                       | 0.015                  |
| 5  | 4              | 2              | 4  | 3              | 1              | 54025.070                      | 54025.067                       | 0.003                  |
| 5  | 4              | 1              | 4  | 3              | 2              | 54038.345                      | 54038.344                       | 0.001                  |
| 14 | 0              | 14             | 13 | 1              | 13             | 54315.997                      | 54315.997                       | 0.000                  |
| 14 | 1              | 14             | 13 | 0              | 13             | 54406.676                      | 54406.676                       | 0.000                  |
| 6  | 4              | 3              | 5  | 3              | 2              | 58261.154                      | 58261.148                       | 0.006                  |
| 6  | 4              | 2              | 5  | 3              | 3              | 58314.533                      | 58314.540                       | -0.007                 |
| 7  | 4              | 4              | 6  | 3              | 3              | 62444.548                      | 62444.551                       | -0.003                 |
| 7  | 4              | 3              | 6  | 3              | 4              | 62604.996                      | 62604.992                       | 0.004                  |
| 8  | 4              | 5              | 7  | 3              | 4              | 66531.090                      | 66531.092                       | -0.002                 |
| 8  | 4              | 4              | 7  | 3              | 5              | 66930.522                      | 66930.523                       | -0.001                 |
| 6  | 5              | 2              | 5  | 4              | 1              | 67637.590                      | 67637.586                       | 0.004                  |
| 6  | 5              | 1              | 5  | 4              | 2              | 67638.264                      | 67638.268                       | -0.004                 |
| 9  | 4              | 6              | 8  | 3              | 5              | 70459.066                      | 70459.063                       | 0.003                  |
| 9  | 4              | 5              | 8  | 3              | 6              | 71326.844                      | 71326.843                       | 0.001                  |

S3: Rotational transitions of  $^{13}\text{CN}$  isotopologue of succinonitrile

| J | K <sub>a</sub> | K <sub>c</sub> | J' | K <sub>a</sub> | K <sub>c</sub> | $\nu_{\text{obs.}}/\text{MHz}$ | $\nu_{\text{calc.}}/\text{MHz}$ | $\Delta\nu/\text{MHz}$ |
|---|----------------|----------------|----|----------------|----------------|--------------------------------|---------------------------------|------------------------|
| 4 | 4              | 1              | 3  | 3              | 0              | 50525.613                      | 50525.619                       | -0.006                 |
| 4 | 4              | 0              | 3  | 3              | 1              | 50527.268                      | 50527.264                       | 0.004                  |
| 5 | 4              | 2              | 4  | 3              | 1              | 54761.887                      | 54761.885                       | 0.002                  |
| 5 | 4              | 1              | 4  | 3              | 2              | 54773.489                      | 54773.483                       | 0.006                  |
| 6 | 4              | 3              | 5  | 3              | 2              | 58976.341                      | 58976.328                       | 0.013                  |
| 6 | 4              | 2              | 5  | 3              | 3              | 59022.958                      | 59022.971                       | -0.013                 |
| 7 | 4              | 4              | 6  | 3              | 3              | 63143.820                      | 63143.816                       | 0.004                  |
| 7 | 4              | 3              | 6  | 3              | 4              | 63284.045                      | 63284.052                       | -0.007                 |
| 5 | 5              | 1              | 4  | 4              | 0              | 64350.319                      | 64350.292                       | 0.027                  |
| 5 | 5              | 0              | 4  | 4              | 1              | 64350.319                      | 64350.355                       | -0.036                 |
| 8 | 4              | 5              | 7  | 3              | 4              | 67224.937                      | 67224.947                       | -0.010                 |
| 8 | 4              | 4              | 7  | 3              | 5              | 67574.512                      | 67574.506                       | 0.006                  |
| 6 | 5              | 2              | 5  | 4              | 1              | 68594.197                      | 68594.202                       | -0.005                 |
| 6 | 5              | 1              | 5  | 4              | 2              | 68594.779                      | 68594.767                       | 0.012                  |
| 9 | 4              | 6              | 8  | 3              | 5              | 71164.120                      | 71164.107                       | 0.013                  |
| 9 | 4              | 5              | 8  | 3              | 6              | 71925.189                      | 71925.189                       | 0.000                  |

S3: Rotational transitions of  $^{15}\text{N}$  isotopologue of succinonitrile

| J | K <sub>a</sub> | K <sub>c</sub> | J' | K <sub>a</sub> | K <sub>c</sub> | $\nu_{\text{obs.}}/\text{MHz}$ | $\nu_{\text{calc.}}/\text{MHz}$ | $\Delta\nu/\text{MHz}$ |
|---|----------------|----------------|----|----------------|----------------|--------------------------------|---------------------------------|------------------------|
| 4 | 4              | 1              | 3  | 3              | 0              | 49870.226                      | 49870.287                       | -0.061                 |
| 4 | 4              | 0              | 3  | 3              | 1              | 49871.959                      | 49871.941                       | 0.018                  |
| 5 | 4              | 2              | 4  | 3              | 1              | 54055.346                      | 54055.366                       | -0.020                 |
| 5 | 4              | 1              | 4  | 3              | 2              | 54067.042                      | 54067.028                       | 0.014                  |
| 6 | 4              | 3              | 5  | 3              | 2              | 58218.577                      | 58218.576                       | 0.001                  |
| 6 | 4              | 2              | 5  | 3              | 3              | 58265.472                      | 58265.471                       | 0.001                  |
| 7 | 4              | 4              | 6  | 3              | 3              | 62334.723                      | 62334.716                       | 0.007                  |
| 7 | 4              | 3              | 6  | 3              | 4              | 62475.676                      | 62475.680                       | -0.004                 |
| 5 | 5              | 1              | 4  | 4              | 0              | 63515.192                      | 63515.160                       | 0.032                  |
| 5 | 5              | 0              | 4  | 4              | 1              | 63515.192                      | 63515.223                       | -0.031                 |
| 8 | 4              | 5              | 7  | 3              | 4              | 66364.286                      | 66364.289                       | -0.003                 |
| 8 | 4              | 4              | 7  | 3              | 5              | 66715.563                      | 66715.562                       | 0.001                  |
| 6 | 5              | 2              | 5  | 4              | 1              | 67707.933                      | 67707.939                       | -0.006                 |
| 6 | 5              | 1              | 5  | 4              | 2              | 67708.523                      | 67708.510                       | 0.013                  |
| 9 | 4              | 6              | 8  | 3              | 5              | 70251.643                      | 70251.643                       | 0.000                  |

S4: Rotational transitions of  $^2\text{H}$  (anti-H) isotopologue of succinonitrile

| J | K <sub>a</sub> | K <sub>c</sub> | J' | K <sub>a</sub> | K <sub>c</sub> | $\nu_{\text{obs.}}/\text{MHz}$ | $\nu_{\text{calc.}}/\text{MHz}$ | $\Delta\nu/\text{MHz}$ |
|---|----------------|----------------|----|----------------|----------------|--------------------------------|---------------------------------|------------------------|
| 4 | 4              | 1              | 3  | 3              | 0              | 48528.391                      | 48528.365                       | 0.026                  |
| 4 | 4              | 0              | 3  | 3              | 1              | 48530.145                      | 48530.139                       | 0.006                  |
| 5 | 4              | 2              | 4  | 3              | 1              | 52772.031                      | 52772.021                       | 0.010                  |
| 5 | 4              | 1              | 4  | 3              | 2              | 52784.469                      | 52784.528                       | -0.059                 |
| 6 | 4              | 3              | 5  | 3              | 2              | 56992.609                      | 56992.575                       | 0.034                  |
| 6 | 4              | 2              | 5  | 3              | 3              | 57042.895                      | 57042.866                       | 0.029                  |
| 7 | 4              | 4              | 6  | 3              | 3              | 61163.328                      | 61163.357                       | -0.029                 |
| 7 | 4              | 3              | 6  | 3              | 4              | 61314.473                      | 61314.480                       | -0.007                 |
| 5 | 5              | 0              | 4  | 4              | 1              | 61782.129                      | 61782.165                       | -0.036                 |
| 5 | 5              | 1              | 4  | 4              | 0              | 61782.129                      | 61782.094                       | 0.035                  |
| 8 | 4              | 5              | 7  | 3              | 4              | 65242.652                      | 65242.635                       | 0.017                  |
| 8 | 4              | 4              | 7  | 3              | 5              | 65618.914                      | 65618.914                       | 0.000                  |
| 6 | 5              | 2              | 5  | 4              | 1              | 66033.711                      | 66033.710                       | 0.001                  |
| 6 | 5              | 1              | 5  | 4              | 2              | 66034.352                      | 66034.347                       | 0.005                  |
| 9 | 4              | 6              | 8  | 3              | 5              | 69172.039                      | 69172.040                       | -0.001                 |
| 9 | 4              | 5              | 8  | 3              | 6              | 69989.727                      | 69989.727                       | 0.000                  |
| 7 | 5              | 3              | 6  | 4              | 2              | 70279.609                      | 70279.602                       | 0.007                  |
| 7 | 5              | 2              | 6  | 4              | 3              | 70282.781                      | 70282.800                       | -0.019                 |

S5: Rotational transitions of  $^2\text{H}$  (anti-CN) isotopologue of succinonitrile

| J | K <sub>a</sub> | K <sub>c</sub> | J' | K <sub>a</sub> | K <sub>c</sub> | $\nu_{\text{obs.}}/\text{MHz}$ | $\nu_{\text{calc.}}/\text{MHz}$ | $\Delta\nu/\text{MHz}$ |
|---|----------------|----------------|----|----------------|----------------|--------------------------------|---------------------------------|------------------------|
| 4 | 4              | 1              | 3  | 3              | 0              | 48157.023                      | 48157.028                       | -0.005                 |
| 4 | 4              | 0              | 3  | 3              | 1              | 48159.289                      | 48159.302                       | -0.013                 |
| 5 | 4              | 2              | 4  | 3              | 1              | 52380.066                      | 52380.065                       | 0.001                  |
| 5 | 4              | 1              | 4  | 3              | 2              | 52396.078                      | 52396.102                       | -0.024                 |
| 6 | 4              | 3              | 5  | 3              | 2              | 56574.523                      | 56574.506                       | 0.017                  |
| 6 | 4              | 2              | 5  | 3              | 3              | 56639.035                      | 56638.989                       | 0.046                  |
| 7 | 4              | 4              | 6  | 3              | 3              | 60707.109                      | 60707.118                       | -0.009                 |
| 7 | 4              | 3              | 6  | 3              | 4              | 60900.691                      | 60900.712                       | -0.021                 |
| 8 | 4              | 5              | 7  | 3              | 4              | 64726.125                      | 64726.159                       | -0.034                 |
| 8 | 4              | 4              | 7  | 3              | 5              | 65207.148                      | 65207.163                       | -0.015                 |
| 6 | 5              | 2              | 5  | 4              | 1              | 65540.891                      | 65540.777                       | 0.114                  |
| 6 | 5              | 1              | 5  | 4              | 2              | 65541.562                      | 65541.666                       | -0.104                 |
| 9 | 4              | 6              | 8  | 3              | 5              | 68560.750                      | 68560.742                       | 0.008                  |
| 9 | 4              | 5              | 8  | 3              | 6              | 69602.055                      | 69602.045                       | 0.010                  |

S6:

M. J. Frisch, G. W. Trucks, H. B. Schlegel, G. E. Scuseria, M. A. Robb, J. R. Cheeseman, G. Scalmani, V. Barone, B. Mennucci, G. A. Petersson, H. Nakatsuji, M. Caricato, X. Li, H. P. Hratchian, A. F. Izmaylov, J. Bloino, G. Zheng, J. L. Sonnenberg, M. Hada, M. Ehara, K. Toyota, R. Fukuda, J. Hasegawa, M. Ishida, T. Nakajima, Y. Honda, O. Kitao, H. Nakai, T. Vreven, J. A. Montgomery, Jr., J. E. Peralta, F. Ogliaro, M. Bearpark, J. J. Heyd, E. Brothers, K. N. Kudin, V. N. Staroverov, R. Kobayashi, J. Normand, K. Raghavachari, A. Rendell, J. C. Burant, S. S. Iyengar, J. Tomasi, M. Cossi, N. Rega, J. M. Millam, M. Klene, J. E. Knox, J. B. Cross, V. Bakken, C. Adamo, J. Jaramillo, R. Gomperts, R. E. Stratmann, O. Yazyev, A. J. Austin, R. Cammi, C. Pomelli, J. W. Ochterski, R. L. Martin, K. Morokuma, V. G. Zakrzewski, G. A. Voth, P. Salvador, J. J. Dannenberg, S. Dapprich, A. D. Daniels, Ö. Farkas, J. B. Foresman, J. V. Ortiz, J. Cioslowski, and D. J. Fox. Gaussian 09. Revision A.1. Gaussian, Inc., Wallingford CT, 2009.
